# Supplementary material for: Mechanism of Co–C photodissociation in adenosylcobalamin
Source: Royal Society of Chemistry journal article supplement (doi:10.1039/c6cp02136k), 2016-01-01
Supplement: c6cp02136k1.pdf [file c6cp02136k1.pdf]

## **Supporting Information for**

### **Mechanism of Co-C Photodissociation in Adenosylcobalamin**

Brady D. Garabato,<sup>1</sup> Piotr Lodowski,<sup>2</sup> Maria Jaworska,<sup>2</sup>  
and Pawel M. Kozlowski\*<sup>1,3</sup>

<sup>1</sup> Department of Chemistry, University of Louisville, Louisville, Kentucky 40292, United States

<sup>2</sup> Department of Theoretical Chemistry, Institute of Chemistry, University of Silesia, Szkolna 9,  
PL-40 006 Katowice, Poland

<sup>3</sup> Visiting professor, Department of Food Sciences, Medical University of Gdansk, Al.  
Gen. J. Hallera 107, 80-416 Gdansk, Poland

## Contents

**Table S1.** Selected geometrical parameters for Im-[Co<sup>III</sup>(corrin)]-Ado<sup>+</sup> model complex. The parameters for ground state of Im-[Co<sup>III</sup>(corrin)]-Ado<sup>+</sup> are compared with experimental data.

**Table S2.** Selected geometrical parameters for Im-[Co<sup>III</sup>(corrin)]-Ado<sup>+</sup> model complex and other species involved in the photoreaction process. The parameters for ground state of Im-[Co<sup>III</sup>(corrin)]-Ado<sup>+</sup> are compared with experimental.

**Table S3.** NBO charges for Im-[Co<sup>III</sup>(corrin)]-Ado<sup>+</sup> model complex and other species involved in the photoreaction process. Results for S<sub>0</sub> and S<sub>1</sub> optimized geometry.

**Figure S1.** Structural model of AdoCbl used in the calculations.

**Figure S2.** Molecular orbital diagram for Im-[Co<sup>III</sup>(corrin)]-Ado<sup>+</sup> model complex in the S<sub>0</sub> and S<sub>1</sub> optimized geometry.

**Figure S3.** HOMO and LUMO molecular orbitals for electron excitations in the optimized geometries of S<sub>1</sub> states together with isosurface and cross-section contour along the axial bonding (in two different section planes) of electron density difference between the S<sub>1</sub> and S<sub>0</sub> states for substrate and products of photolysis process.

**Figure S4.** Energy diagram of photoreaction on Path A.

**Figure S5.** Energy diagram of photoreaction on Path B.

**Table S1.** Selected geometrical parameters for Im-[Co<sup>III</sup>(corrin)]-Ado<sup>+</sup> model complex. The parameters for ground state of Im-[Co<sup>III</sup>(corrin)]-Ado<sup>+</sup> are compared with experimental data (atom numbering is given in Figure S1).

| Structural parameter                                               | S <sub>0</sub> | Exp. <sup>a</sup> | S <sub>1</sub> |
|--------------------------------------------------------------------|----------------|-------------------|----------------|
| r [Å]                                                              |                |                   |                |
| Co-C                                                               | 2.014          | 2.032             | 2.060          |
| C-N <sub>Im</sub>                                                  | 2.193          | 2.240             | 2.046          |
| Co-N <sub>21</sub>                                                 | 1.877          | 1.880             | 1.886          |
| Co-N <sub>22</sub>                                                 | 1.936          | 1.915             | 1.970          |
| Co-N <sub>23</sub>                                                 | 1.938          | 1.912             | 1.972          |
| Co-N <sub>24</sub>                                                 | 1.880          | 1.868             | 1.884          |
| Bond angles                                                        |                |                   |                |
| C-Co-N <sub>Im</sub>                                               | 176.7          | 171.3             | 165.1          |
| N <sub>21</sub> -Co-C                                              | 89.0           | 92.6              | 99.0           |
| N <sub>22</sub> -Co-C                                              | 89.0           | 84.07             | 82.9           |
| N <sub>23</sub> -Co-C                                              | 86.1           | 90.3              | 84.0           |
| N <sub>24</sub> -Co-C                                              | 88.8           | 93.2              | 94.9           |
| N <sub>21</sub> -Co-N <sub>Im</sub>                                | 88.0           | 91.8              | 92.6           |
| N <sub>22</sub> -Co-N <sub>Im</sub>                                | 89.6           | 88.5              | 87.7           |
| N <sub>23</sub> -Co-N <sub>Im</sub>                                | 87.0           | 86.2              | 85.5           |
| N <sub>24</sub> -Co-N <sub>Im</sub>                                | 92.3           | 94.8              | 95.9           |
| N <sub>21</sub> -Co-N <sub>22</sub>                                | 91.3           | 89.8              | 90.5           |
| N <sub>22</sub> -Co-N <sub>23</sub>                                | 94.7           | 96.8              | 96.3           |
| N <sub>23</sub> -Co-N <sub>24</sub>                                | 91.6           | 90.2              | 91.2           |
| N <sub>24</sub> -Co-N <sub>21</sub>                                | 82.5           | 83.2              | 82.1           |
| Co-N <sub>21</sub> -C <sub>1</sub>                                 | 116.6          | 117.5             | 116.7          |
| Co-N <sub>22</sub> -C <sub>9</sub>                                 | 124.8          | 122.9             | 122.7          |
| Co-N <sub>23</sub> -C <sub>11</sub>                                | 124.3          | 123.3             | 122.7          |
| Co-N <sub>24</sub> -C <sub>19</sub>                                | 116.9          | 115.4             | 116.9          |
| Torsion angles                                                     |                |                   |                |
| N <sub>21</sub> -N <sub>22</sub> -N <sub>23</sub> -Co              | -3.4           | -1.6              | -1.5           |
| N <sub>21</sub> -N <sub>22</sub> -N <sub>23</sub> -N <sub>24</sub> | -4.5           | -3.5              | -3.6           |
| Co-N <sub>22</sub> -C <sub>9</sub> -C <sub>10</sub>                | 1.4            | -6.0              | -1.3           |
| Co-N <sub>22</sub> -C <sub>6</sub> -C <sub>5</sub>                 | -8.4           | -14.4             | -5.7           |
| Co-N <sub>23</sub> -C <sub>14</sub> -C <sub>15</sub>               | 1.1            | -3.9              | -0.5           |
| Co-N <sub>21</sub> -C <sub>1</sub> -C <sub>19</sub>                | 33.5           | 33.3              | 33.6           |
| N <sub>21</sub> -C <sub>1</sub> -C <sub>19</sub> -N <sub>24</sub>  | -37.3          | -38.4             | -38.5          |
| N <sub>21</sub> -Co-N <sub>24</sub> -C <sub>19</sub>               | -10.2          | -11.1             | -11.8          |
| C <sub>1</sub> -C <sub>2</sub> -C <sub>3</sub> -C <sub>4</sub>     | -24.6          | -29.4             | -25.7          |
| C <sub>6</sub> -C <sub>7</sub> -C <sub>8</sub> -C <sub>9</sub>     | -10.5          | -28.7             | -10.9          |
| C <sub>11</sub> -C <sub>12</sub> -C <sub>13</sub> -C <sub>14</sub> | 8.1            | -25.0             | 0.7            |
| C <sub>16</sub> -C <sub>17</sub> -C <sub>18</sub> -C <sub>19</sub> | -26.7          | -31.5             | -26.7          |

<sup>a</sup> Ouyang, L.; Rulis, P.; Ching, G.; Nardin, L.; Randaccio, L. *Inorg. Chem.* **2004**, 43, 1235-1241. The structure contains in the "lower" axial position, the 5,6 – dimethylbenzimidazole (DBI) as an axial ligand.

**Table S2.** Selected geometrical parameters for Im-[Co<sup>III</sup>(corrin)]-Ado<sup>+</sup> model complex and other species involved in the photoreaction process. The parameters for ground state of Im-[Co<sup>III</sup>(corrin)]-Ado<sup>+</sup> are compared with experimental data (atom numbering is given in Figure S1).

| Im-[Co <sup>III</sup> (corrin)]-Ado <sup>+</sup> | I (S <sub>0min</sub> )    | I (S <sub>1min</sub> )    | Exp. <sup>a</sup>        |
|--------------------------------------------------|---------------------------|---------------------------|--------------------------|
| Bond distances [Å]                               |                           |                           |                          |
| Co-C                                             | 2.014                     | 2.060                     | 2.032                    |
| C-N <sub>Im</sub>                                | 2.193                     | 2.046                     | 2.240                    |
| Co-N <sub>21</sub>                               | 1.877                     | 1.886                     | 1.880                    |
| Co-N <sub>22</sub>                               | 1.936                     | 1.970                     | 1.915                    |
| Co-N <sub>23</sub>                               | 1.938                     | 1.972                     | 1.912                    |
| Co-N <sub>24</sub>                               | 1.880                     | 1.884                     | 1.868                    |
| Bond angles [deg]                                |                           |                           |                          |
| C-Co-N <sub>Im</sub>                             | 176.7                     | 165.1                     | 171.3                    |
| N <sub>21</sub> -Co-N <sub>23</sub>              | 172.2                     | 172.8                     | 172.9                    |
| N <sub>22</sub> -Co-N <sub>24</sub>              | 173.5                     | 171.9                     | 172.4                    |
| Im-[Co <sup>II</sup> (corrin)] <sup>+</sup>      | IIIA (S <sub>0min</sub> ) | IIIA (S <sub>1min</sub> ) | IVA (S <sub>1min</sub> ) |
| Bond distances [Å]                               |                           |                           |                          |
| C-N <sub>Im</sub>                                | 2.162                     | 4.863                     | 1.882                    |
| Co-N <sub>21</sub>                               | 1.879                     | 1.843                     | 1.884                    |
| Co-N <sub>22</sub>                               | 1.940                     | 1.913                     | 1.945                    |
| Co-N <sub>23</sub>                               | 1.935                     | 1.917                     | 1.946                    |
| Co-N <sub>24</sub>                               | 1.882                     | 1.843                     | 1.894                    |
| Bond angles [deg]                                |                           |                           |                          |
| N <sub>21</sub> -Co-N <sub>23</sub>              | 172.1                     | 170.2                     | 169.7                    |
| N <sub>22</sub> -Co-N <sub>24</sub>              | 165.6                     | 170.3                     | 164.2                    |

<sup>a</sup> Ouyang, L.; Rulis, P.; Ching, G.; Nardin, L.; Randaccio, L. *Inorg. Chem.* **2004**, *43*, 1235-1241. The structure contains in the "lower" axial position, the 5,6 – dimethylbenzimidazol (DBI) as a axial ligand

**Table S3.** NBO charges for Im-[Co<sup>III</sup>(corrin)]-Ado<sup>+</sup> model complex and other species involved in the photoreaction process. Results for S<sub>0</sub> and S<sub>1</sub> optimized geometry.

|                                                      | NBO charges               |                           |                 | $\Delta q$ <sup>a)</sup> |
|------------------------------------------------------|---------------------------|---------------------------|-----------------|--------------------------|
|                                                      | q <sub>S0</sub>           | q <sub>S0</sub>           | q <sub>S1</sub> |                          |
|                                                      | I (S <sub>0min</sub> )    | I (S <sub>1min</sub> )    |                 |                          |
| <b>Im-[Co<sup>III</sup>(corrin)]-Ado<sup>+</sup></b> |                           |                           |                 |                          |
| Co                                                   | 0.767                     | 0.782                     | 0.885           | 0.104                    |
| C                                                    | -0.469                    | -0.502                    | -0.415          | 0.087                    |
| N <sub>Im</sub>                                      | -0.471                    | -0.468                    | -0.413          | 0.055                    |
| Ado                                                  | -0.133                    | -0.144                    | 0.021           | 0.165                    |
| Im                                                   | 0.153                     | 0.179                     | 0.291           | 0.112                    |
| Corr                                                 | 0.213                     | 0.183                     | -0.198          | -0.381                   |
| <b>Im-[Co<sup>II</sup>(corrin)]<sup>+</sup></b>      | IIIA (S <sub>0min</sub> ) | IIIA (S <sub>1min</sub> ) |                 |                          |
| Co                                                   | 0.911                     | 0.975                     | 0.920           | -0.055                   |
| N <sub>Im</sub>                                      | -0.475                    | -0.487                    | -0.486          | 0.001                    |
| Im                                                   | 0.141                     | 0.002                     | 0.002           | 0.000                    |
| Corr                                                 | -0.052                    | 0.023                     | 0.078           | 0.055                    |
|                                                      |                           | IVA (S <sub>1min</sub> )  |                 |                          |
| Co                                                   |                           | 0.863                     | 0.883           | 0.020                    |
| N <sub>Im</sub>                                      |                           | -0.471                    | -0.310          | 0.161                    |
| Im                                                   |                           | 0.167                     | 0.414           | 0.247                    |
| Corr                                                 |                           | -0.030                    | -0.297          | -0.267                   |

<sup>a)</sup>  $\Delta q$  – difference between charge in excited state and ground state in geometry excited state.

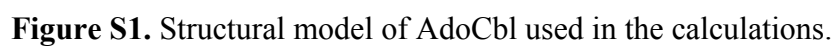

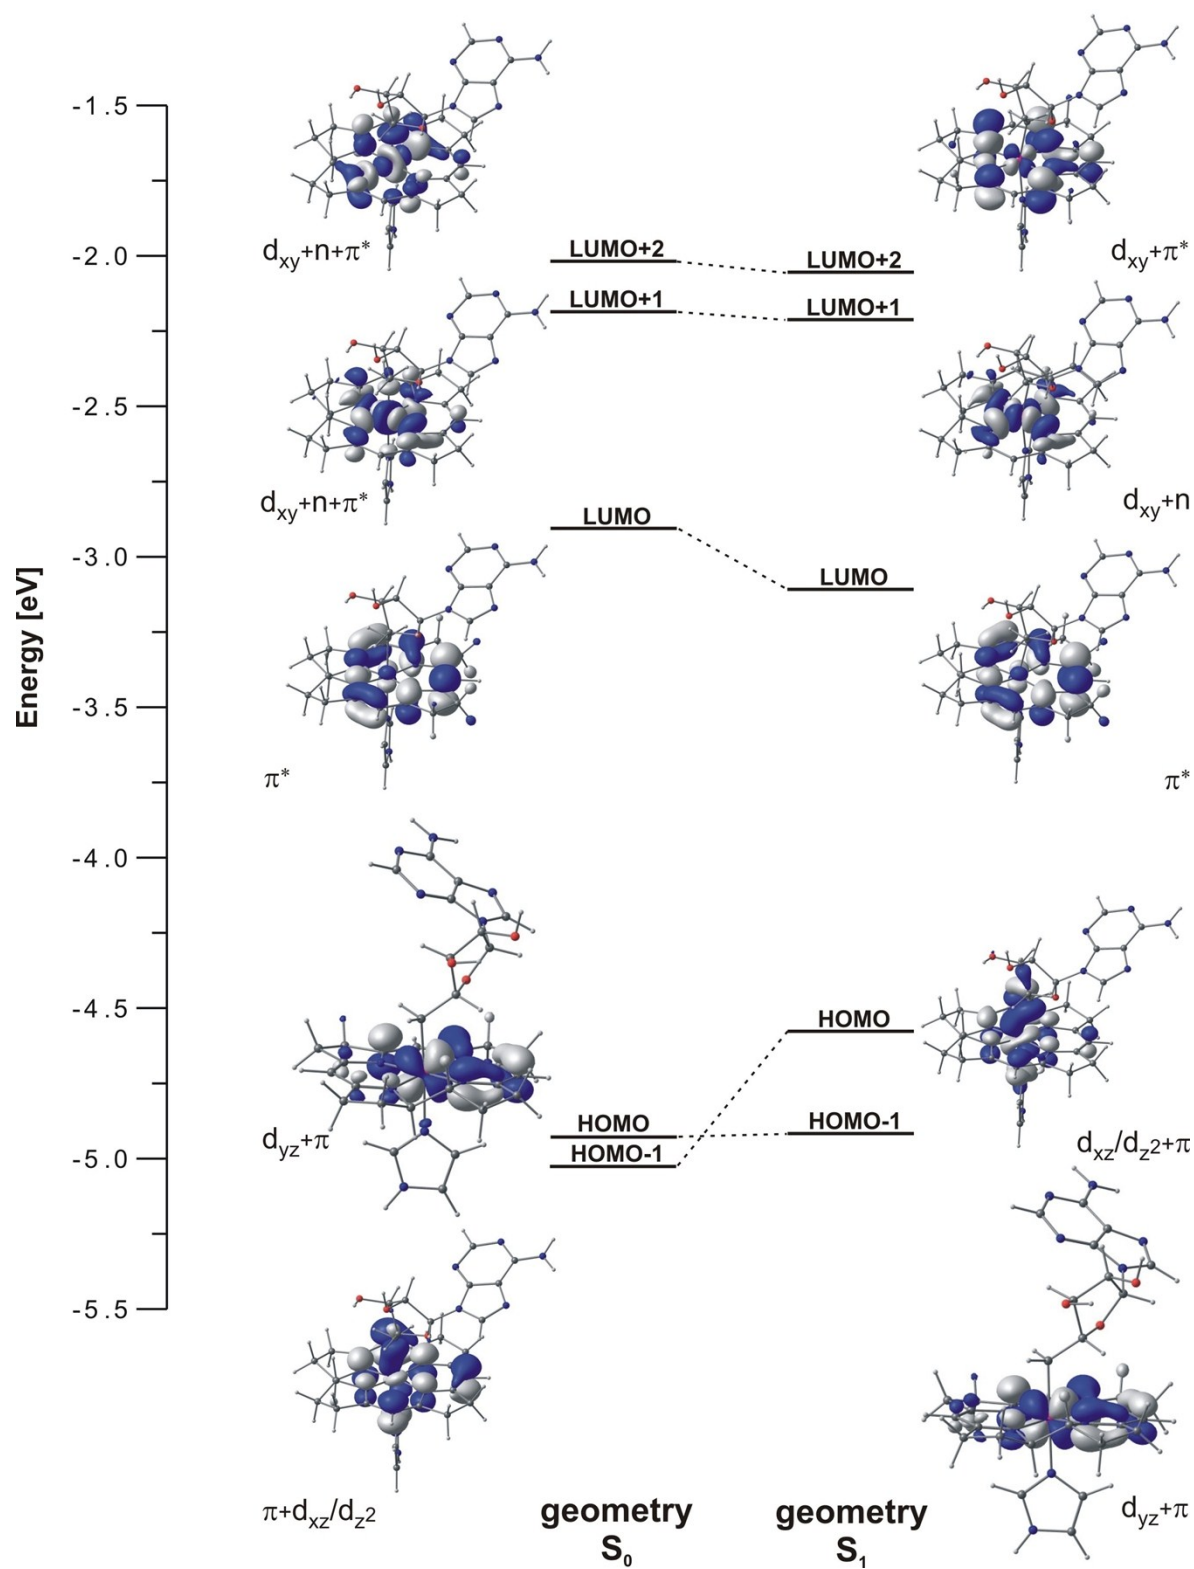

**Figure S2.** Molecular orbital diagram for Im-[Co<sup>III</sup>(corrin)]-Ado<sup>+</sup> model complex in the  $S_0$  and  $S_1$  optimized geometry.

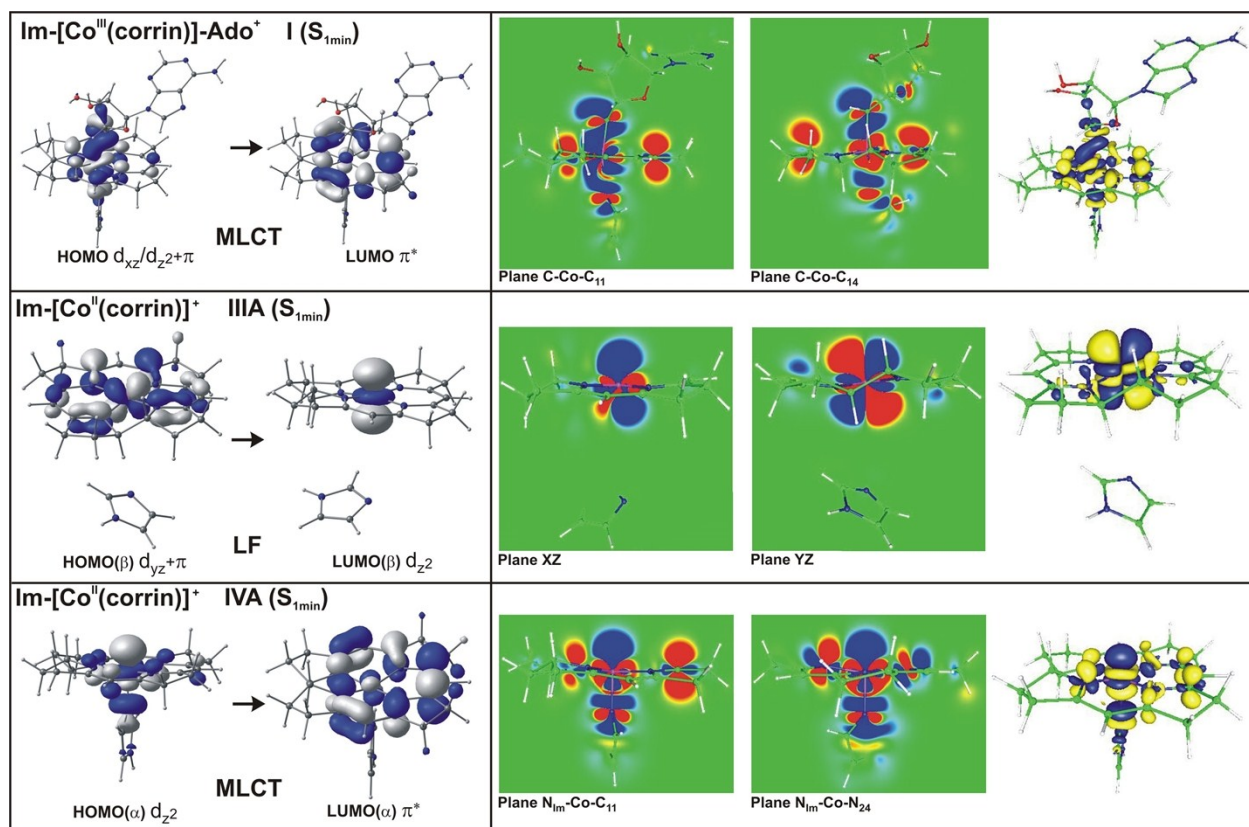

**Figure S3.** HOMO and LUMO molecular orbitals for electron excitations in the optimized geometries of S<sub>1</sub> states together with isosurface and cross-section contour along the axial bonding (in two different section planes) of electron density difference between the S<sub>1</sub> and S<sub>0</sub> states for substrate and products of photolysis process. The yellow and red colors denote electron space, blue color - hole space.



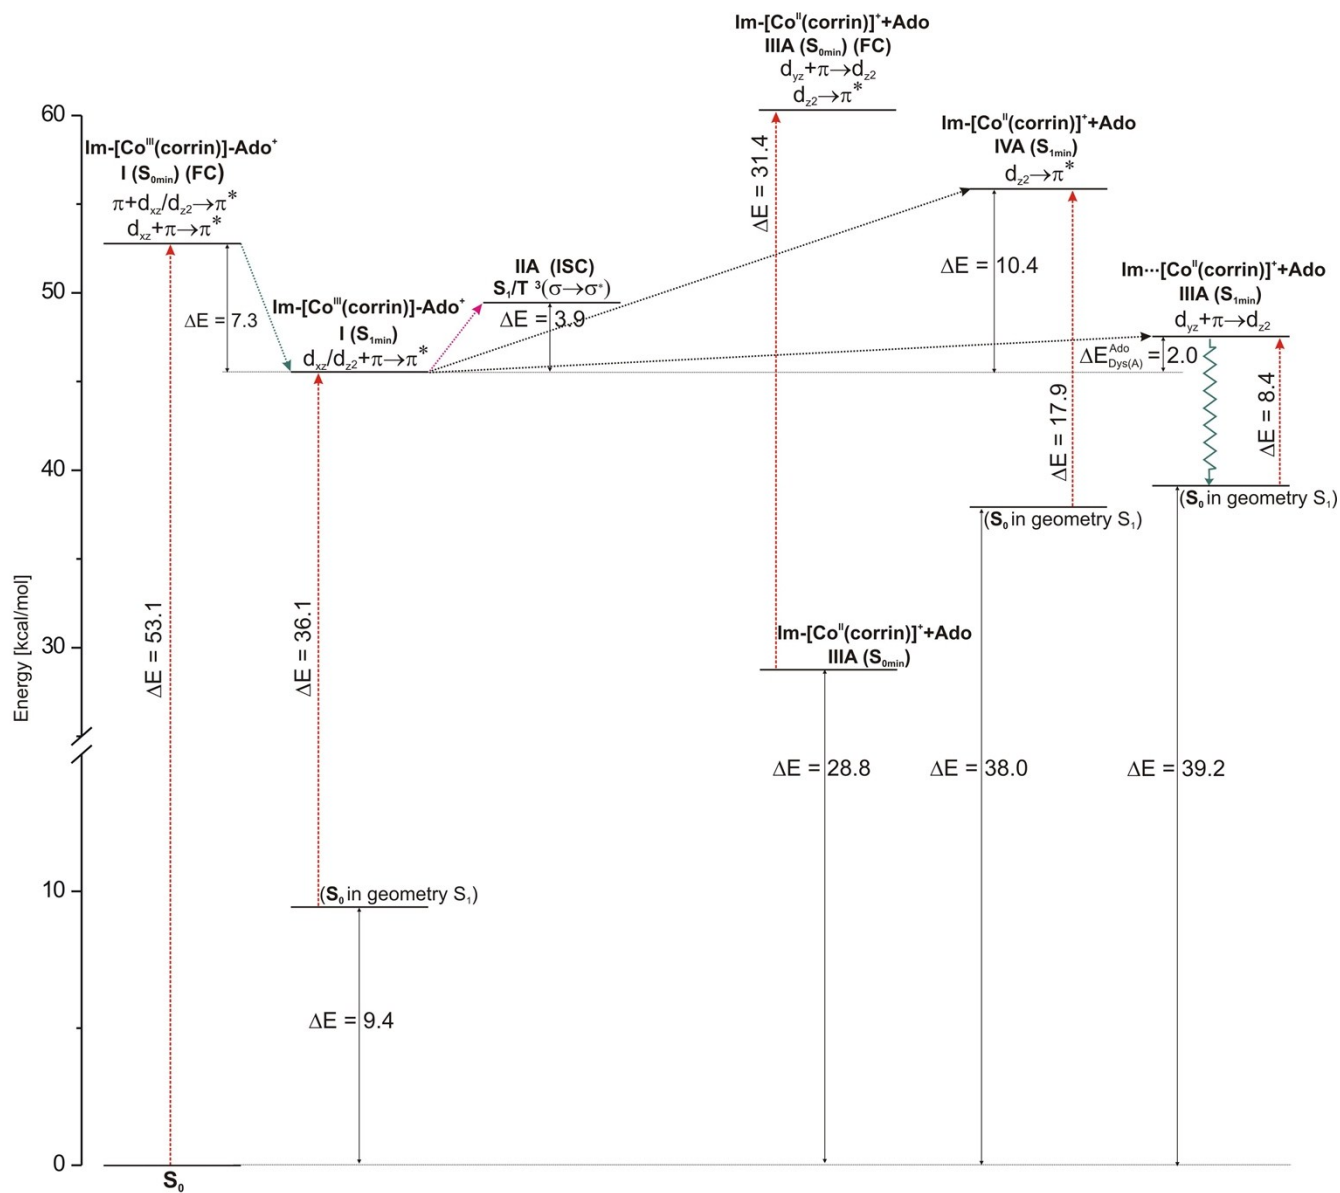

**Figure S4.** Energy diagram of photoreaction on Path A ( $\Delta E$  values in kcal/mol).

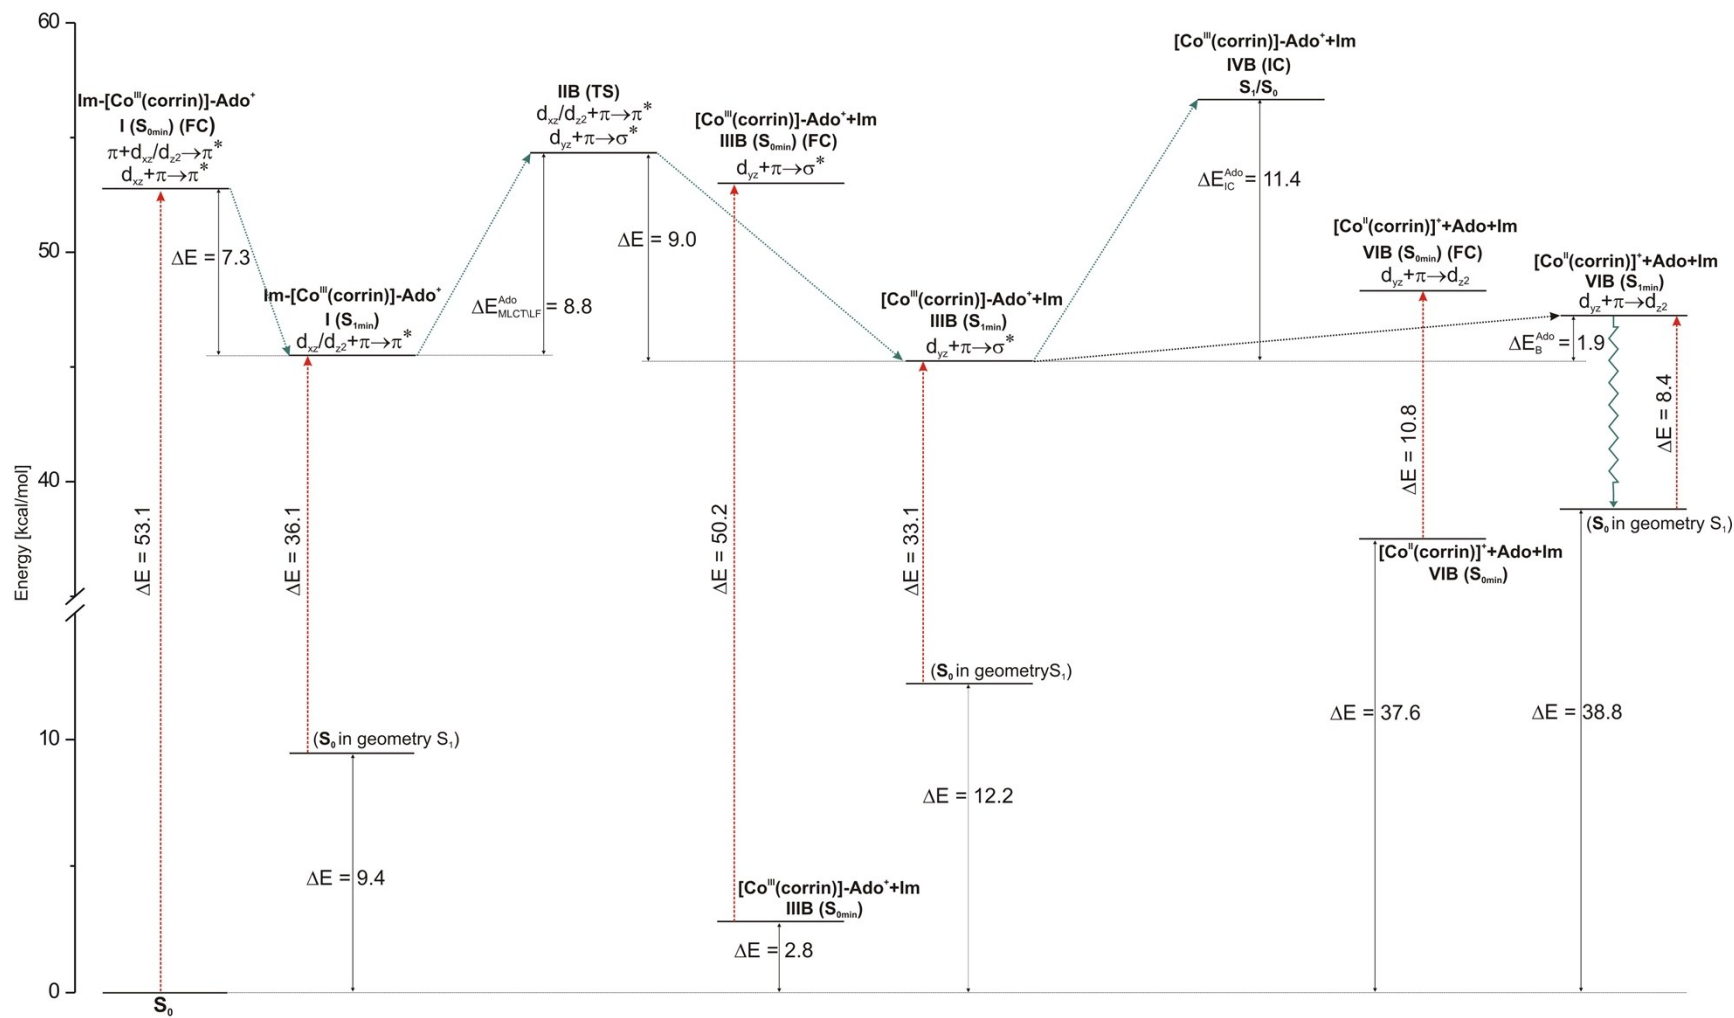

**Figure S5.** Energy diagram of photoreaction on Path B ( $\Delta E$  values in kcal/mol).
